# Supplementary material for: Therapeutic Effect of Tetrapanax papyriferus and Hederagenin on Chronic Neuropathic Pain of Chronic Constriction Injury of Sciatic Nerve Rats Based on KEGG Pathway Prediction and Experimental Verification
Source: Hindawi journal article supplement (doi:10.1155/2020/2545806), 2020-01-01
Supplement: f1 [file 2545806.f1.pdf]

## Experimental supplement material

Table 1 Comparison of cold allodynia behavior in different groups of rats at different time points (times/minute)

|               | Group | -1d       | 1d        | 4d          | 7d          | 14d         | 21d         |
|---------------|-------|-----------|-----------|-------------|-------------|-------------|-------------|
| Acetone score | SG    | 0.76±0.32 | 1.33±0.27 | 1.24±0.25*  | 0.86±0.26*  | 1.00 ±0.27* | 0.71±0.56*  |
|               | CG    | 0.67±0.43 | 1.19±0.18 | 5.24±0.66#  | 9.10±0.37#  | 11.29±1.26# | 9.88±0.63#  |
|               | PG    | 0.67±0.34 | 1.38±0.23 | 2.38±0.23*  | 5.48±0.61*# | 5.71±0.76*# | 5.86±0.51*# |
|               | MG    | 0.76±0.45 | 1.43±0.25 | 2.05±0.45*  | 6.24±0.90*# | 6.00±0.67*# | 6.52±0.74*# |
|               | TG    | 0.72±0.12 | 1.43±0.25 | 2.19±0.42*  | 6.90±0.60*# | 7.19±0.69*# | 7.10±0.37*# |
|               | HG    | 0.61±0.41 | 1.38±0.23 | 4.76±0.60*# | 7.33±0.43*# | 7.38±0.45*# | 7.14±0.42*# |

\* states the contrast of CG and other groups,  $p < 0.05$ . #means the comparison of SG and other groups,  $p < 0.05$ .

Table 2 Comparison of mechanical allodynia behavior of rats in different groups at different time points

|         | Group | -1d        | 1d          | 4d           | 7d           | 14d         | 21d          |
|---------|-------|------------|-------------|--------------|--------------|-------------|--------------|
| 50% MWT | SG    | 23.29±0.69 | 16.46±1.28  | 23.02±0.51*  | 23.21±0.52*  | 23.49±0.54* | 24.02±0.87*  |
|         | CG    | 25.02±1.21 | 15.567±0.83 | 12.96±1.035# | 7.62±0.92#   | 4.37±0.10#  | 3.96±0.56#   |
|         | PG    | 24.21±1.70 | 17.60±1.03  | 12.25±2.148# | 11.70±0.44*# | 9.62±0.90*# | 14.80±0.76*# |
|         | MG    | 23.59±1.83 | 16.98±1.60  | 11.00±1.60#  | 10.45±1.03*# | 7.97±0.67*# | 12.33±0.54*# |
|         | TG    | 24.65±1.78 | 16.38±1.16  | 11.36±2.19#  | 10.95±1.28*# | 7.55±0.60*# | 8.98±0.44*#  |
|         | HG    | 24.21±1.82 | 16.00±1.32  | 11.91±1.82#  | 10.96±0.97*# | 7.08±0.13*# | 7.13±0.54*#  |

\* states the contrast of CG and other groups,  $p < 0.05$ . #means the comparison of SG and other groups,  $p < 0.05$ . MWT: Mechanical withdrawal threshold

Table 3 Comparison of thermopathic behavioral behavior of rats in different groups at different time points (sec)

|     | Group | -1d        | 1d         | 4d          | 7d           | 14d          | 21d          |
|-----|-------|------------|------------|-------------|--------------|--------------|--------------|
| PWL | SG    | 19.09±0.78 | 15.19±1.52 | 17.91±0.70* | 17.94±1.49*  | 18.00±1.06*  | 18.94±1.25*  |
|     | CG    | 19.61±0.63 | 14.42±1.89 | 6.81±0.46#  | 5.13±0.99#   | 4.61±0.76#   | 7.25±0.43#   |
|     | PG    | 19.32±0.72 | 13.96±2.00 | 6.88±0.29#  | 10.07±1.18*# | 13.69±1.459* | 17.11±1.16*  |
|     | MG    | 19.58±0.60 | 14.10±2.72 | 7.00±0.80#  | 9.11±1.41*#  | 10.45±1.06*# | 15.80±0.81*# |
|     | TG    | 19.94±0.23 | 15.52±1.61 | 6.84±0.74#  | 7.23±0.62*#  | 8.81±0.98*#  | 14.14±0.42*# |
|     | HG    | 19.78±0.71 | 14.05±1.60 | 6.86±0.72#  | 7.33±0.65*#  | 7.47±0.70*#  | 10.48±0.47*# |

\* states the contrast of CG and other groups,  $p < 0.05$ . #means the comparison of SG and other groups,  $p < 0.05$ . PWL: Paw withdrawal latency
